# Supplementary material for: Association between Plasma Omega-3 and Handgrip Strength According to Glycohemoglobin Levels in Older Adults: Results from NHANES 2011–2012
Source: MDPI journal article supplement (doi:10.3390/nu14194060), 2022-09-29
Supplement: s1 [file s1]

**Table S1.** Types of  $\omega$ -3 plasma fatty acids in individuals with elevated and normal glycohemoglobin. NHANES, 2011-2012.

| $\omega$ -3 Plasma Fatty Acids | Total             |      | Glycohemoglobin < 5.7% |      | Glycohemoglobin $\geq$ 5.7% |      |
|--------------------------------|-------------------|------|------------------------|------|-----------------------------|------|
|                                | $\mu\text{mol/L}$ | %    | $\mu\text{mol/L}$      | %    | $\mu\text{mol/L}$           | %    |
| ALA                            | 96.1              | 26.4 | 91.3                   | 25.5 | 101.0                       | 27.3 |
| EPA                            | 87.7              | 24.1 | 91.0                   | 25.4 | 84.4                        | 22.9 |
| DHA                            | 179.4             | 49.4 | 174.9                  | 49.1 | 183.9                       | 49.8 |
| Total plasma $\omega$ -3 *     | 363.2             | 100  | 357.2                  | 100  | 369.3                       | 100  |

Notes: DHA: docosahexaenoic acid; EPA: eicosapentaenoic acid; ALA: alpha linolenic acid; \* Total plasma  $\omega$ -3 by the sum of ALA (18:3n-3), EPA (20:5n-3), DHA (22:6n-3).
